# Supplementary material for: Lsp1 partially substitutes for Pil1 function in eisosome assembly under stress conditions
Source: Oxford University Press journal article supplement (doi:10.1242/jcs.260554), 2023-01-05
Supplement: jcs260554supp.pdf [file jcs260554supp.pdf]

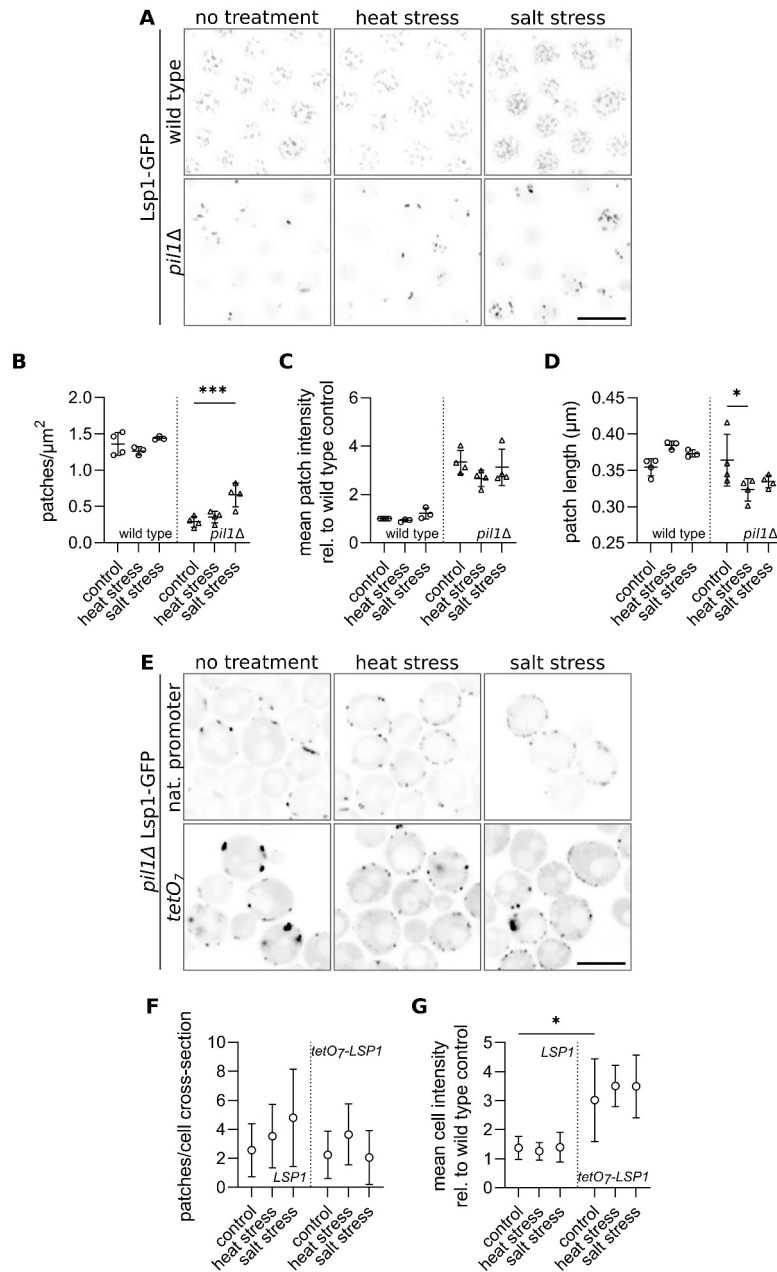

**Fig. S1. Heat and salt stress induce the formation of Lsp1 foci in the plasma membrane.** **A** Confocal fluorescence microscopy images (tangential sections) of *LSP1-GFP* expressing yeast cells grown exponentially for 4 hours at 28°C and subsequently shifted to 37°C for 2 hours or grown at 28°C in the presence of 1 M NaCl for 6 hours. Scale bar: 5  $\mu$ m. **B-D** Quantification of the density of local Lsp1-GFP accumulations (patches)(B), mean patch intensity relative to the wild-type control (C) and patch length (D) in cells treated as in (A). Data are presented as mean  $\pm$  SD from 4 biological replicates (circles – wild type, triangles – *pil1Δ*; 100–150 cells in each condition). **E** Confocal fluorescence microscopy images (transversal sections) of *pil1Δ* yeast cells expressing *LSP1-GFP* from either its native or *tetO<sub>7</sub>* promoter grown exponentially for 4 hours at 28°C and subsequently shifted to 37°C for 2 hours or grown at 28°C in the presence of 1 M NaCl for 6 hours. Scale bar: 5  $\mu$ m. **F-G** Quantification of the number of local Lsp1-GFP accumulations (patches) per cell cross-section (F) and mean cell intensity relative to the wild-type control (G) in cells treated as in (E). Data are presented as mean  $\pm$  SD from a single experiment (circles – wild type, triangles – *pil1Δ*; 100–150 cells in each condition). *tetO<sub>7</sub>-LSP1* indicates overexpression of *LSP1*. \* –  $P \leq 0.1$ , \*\*\* –  $P \leq 0.001$ , two-way ANOVA.

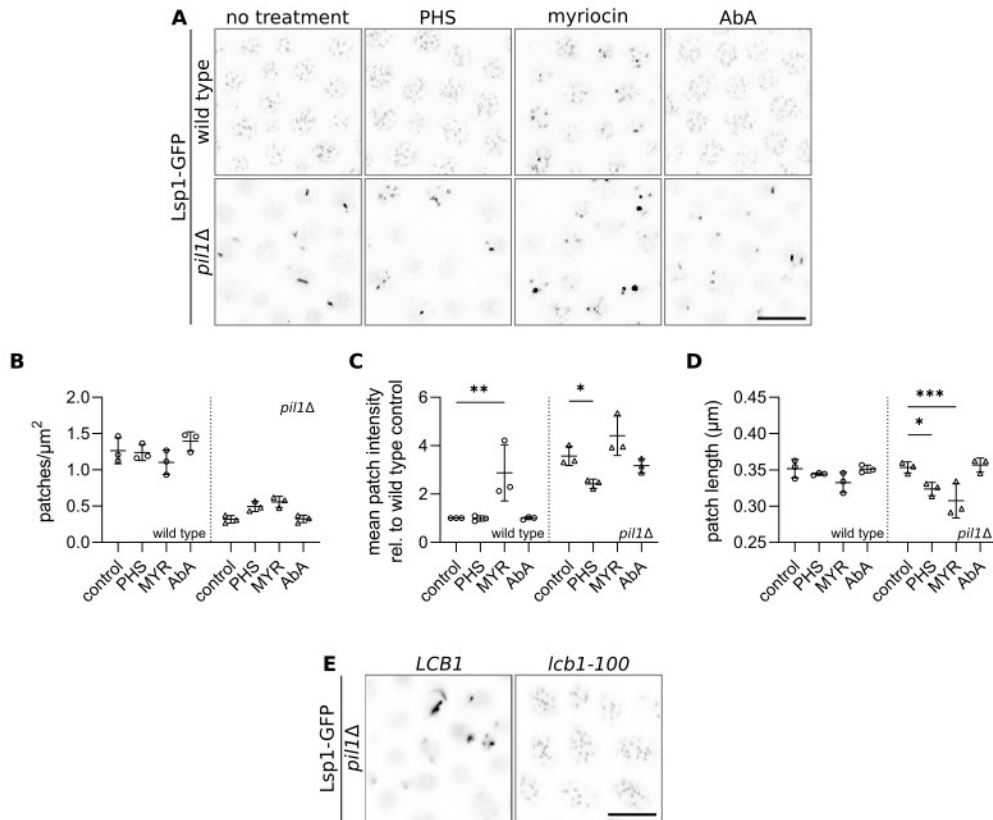

**Fig. S2. Decrease in the activity of serine-palmitoyl transferase induces the formation of *Lsp1* eisosomes in the plasma membrane; tangential sections.**

**A** Confocal fluorescence microscopy images of *LSP1-GFP* expressing yeast cells (BY4742 background) grown exponentially for 4 hours at 28°C and treated with indicated chemicals for 2 hours. **B-D** Quantification of the density of local *Lsp1-GFP* accumulations (patches) (B), mean patch intensity relative to the wild-type control (C) and patch length (D) in cells treated as in (A). Data are presented as mean  $\pm$  SD from 4 biological replicates (circles— wild type, triangles – *pil1Δ*; 150–200 cells in each condition). \* –  $P \leq 0.1$ , \*\* –  $P \leq 0.01$ , \*\*\* –  $P \leq 0.001$ , two-way ANOVA. **E** Confocal fluorescence microscopy images of *LSP1-GFP* expressing yeast cells (RH1800 background) grown exponentially for 5 hours at 25°C. PHS – phytosphingosine, 10  $\mu\text{M}$ ; MYR – myriocin, 10  $\mu\text{M}$ ; AbA – aureobasidin A, 1  $\mu\text{g/ml}$ . Scale bars: 5  $\mu\text{m}$ .

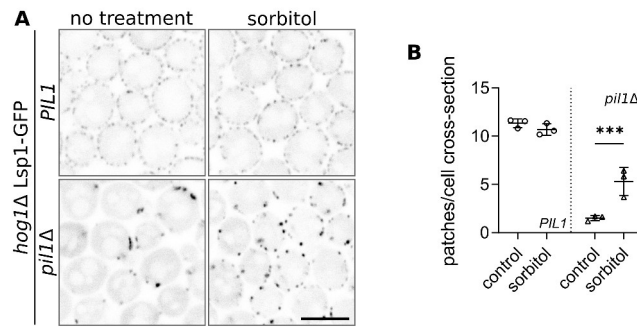

**Fig. S3. Hog1 kinase is not required for Lsp1 eisosome formation in response to hyperosmotic stress**  
**A** Confocal fluorescence microscopy images (transversal sections) of *LSP1-GFP* expressing *hog1Δ* yeast cells grown exponentially for 6 hours at 28°C and treated with nothing or 1 M sorbitol for 25 minutes. Scale bar: 5 μm. **B** Quantification of the number of local Lsp1-GFP accumulations (patches) per cell cross-section in cells treated as in (E). Data are presented as mean ± SD from 3 biological replicates (circles – *hog1Δ*, triangles – *hog1Δpil1Δ*; 170–230 cells in each condition). \*\*\* –  $P \leq 0.001$ , two-way ANOVA.

**Table S1. Yeast strains used in the study.**

| Strain                     | Genotype                                                     | Source                   |
|----------------------------|--------------------------------------------------------------|--------------------------|
| BY4742, wild type          | <i>MATα his3Δ1 leu2Δ0 lys2Δ0 ura3Δ0</i>                      | <i>Euroscarf</i>         |
| <i>hog1Δ</i>               | BY4742; <i>hog1::kanMX4</i>                                  | <i>Euroscarf</i>         |
| <i>nce102Δ</i>             | BY4742; <i>nce102::kanMX4</i>                                | <i>Euroscarf</i>         |
| <i>pil1Δ</i>               | BY4742; <i>pil1::kanMX4</i>                                  | <i>Euroscarf</i>         |
| <i>pil1Δa</i>              | BY4741; <i>pil1::kanMX4</i>                                  | <i>Euroscarf</i>         |
| <i>seg1Δ</i>               | BY4742; <i>seg1::kanMX4</i>                                  | <i>Euroscarf</i>         |
| <i>nce102Δ pil1Δ</i>       | BY4742 except <i>MET15</i> ; <i>pil1Δ nce102Δ</i>            | This study               |
| <i>seg1Δ pil1Δ</i>         | BY4742 except <i>MET15</i> ; <i>seg1Δ pil1Δ</i>              | Vaskovicova et al., 2015 |
| <i>lsp1Δ pil1Δ</i>         | BY4742; <i>lsp1Δ pil1Δ</i>                                   | This study               |
| <i>seg1Δ nce102Δ</i>       | BY4742 except <i>LYS2 met15Δ0</i> ; <i>seg1Δ nce102Δ</i>     | This study               |
| <i>seg1Δ nce102Δ pil1Δ</i> | BY4742 except <i>MET15</i> ; <i>seg1Δ nce102Δ seg1Δ</i>      | This study               |
| Y114                       | <i>pil1Δ nce102Δ</i> ; <i>LSP1::GFP::LEU2</i> (Ylp128)       | This study               |
| Y172                       | BY4742; <i>LSP1::GFP::LEU2</i> (Ylp128)                      | Zahumensky et al., 2022  |
| Y257                       | <i>pil1Δ</i> ; <i>LSP1::GFP::LEU2</i> (Ylp128)               | This study               |
| Y430                       | <i>seg1Δ pil1Δ</i> ; <i>LSP1::GFP::LEU2</i> (Ylp128)         | This study               |
| Y1199                      | BY4742; <i>LSP1::GFP::HIS3</i> (pKT128)                      | This study               |
| Y1214                      | Y1199; <i>LSP1::GFP::G418</i> (pCM225)                       | This study               |
| Y1219                      | Y1214; <i>pil1::pFA6a-natMX6</i>                             | This study               |
| Y1313                      | <i>lsp1Δ pil1Δ</i> ; <i>SEG1::GFP::LEU2</i> (Ylp128)         | This study               |
| Y1315                      | <i>nce102Δ</i> ; <i>LSP1::GFP::LEU2</i> (Ylp128)             | This study               |
| Y1377                      | <i>seg1Δ</i> ; <i>LSP1::GFP::LEU2</i> (Ylp128)               | This study               |
| Y1393                      | <i>seg1Δ nce102Δ pil1Δ</i> ; <i>LSP1::GFP::LEU2</i> (Ylp128) | This study               |
| Y1395                      | <i>seg1Δ nce102Δ</i> ; <i>LSP1::GFP::LEU2</i> (Ylp128)       | This study               |
| Y1417                      | <i>hog1Δ</i> ; <i>LSP1::GFP::LEU2</i> (Ylp128)               | This study               |
| Y1421                      | Y1417; <i>pil1::pFA6a-natMX6</i>                             | This study               |
| RH1800, wild type          | <i>MATα leu2Δ0 trp1Δ0 ura3Δ0 lys2Δ0 bar1-1</i>               | H. Riezman               |
| <i>lcb1-100</i>            | RH1800; <i>lcb1-100</i>                                      | H. Riezman               |
| Y1233                      | RH1800; <i>LSP1::GFP::LEU2</i> (Ylp128)                      | This study               |
| Y1234                      | <i>lcb1-100</i> ; <i>LSP1::GFP::LEU2</i> (Ylp128)            | This study               |
| Y1238                      | Y1233; <i>pil1::pFA6a-natMX6</i>                             | This study               |
| Y1239                      | Y1234; <i>pil1::pFA6a-natMX6</i>                             | This study               |

**Table S2. Parent strains used for the construction of double and triple-deletion strains**

| final strain             | <i>MATα strain</i>                  | <i>MATα strain</i>                   |
|--------------------------|-------------------------------------|--------------------------------------|
| <i>lsp1Δpil1Δ</i>        | <i>pil1Δ LSP1::mRFP::LEU2</i>       | <i>lsp1Δ PIL1::GFP::URA3</i>         |
| <i>seg1Δpil1Δ</i>        | <i>pil1Δ SEG1::GFP::LEU2</i>        | <i>seg1Δ PIL1::mRFP::URA3</i>        |
| <i>nce102Δpil1Δ</i>      | <i>pil1Δ NCE102::mRFP::URA3</i>     | <i>nce102Δ PIL1::GFP::LEU2</i>       |
| <i>seg1Δnce102Δ</i>      | <i>nce102Δ SEG1::GFP::URA3</i>      | <i>seg1Δ NCE102::mRFP::LEU2</i>      |
| <i>seg1Δnce102Δpil1Δ</i> | <i>pil1Δnce102Δ SEG1::GFP::LEU2</i> | <i>pil1Δseg1Δ NCE102::mRFP::URA3</i> |

All listed strains were constructed in the course of this study; for details see Methods

**Table S3. Differentially expressed genes in the *seg1Δnce102Δpil1Δ* mutant relative to the wild type.** Yeast were cultured and processed as described in Methods. As significance thresholds, log 2 fold change (LFC) was set to 1, P-adjusted < 0.05.

[Click here to download Table S3](#)

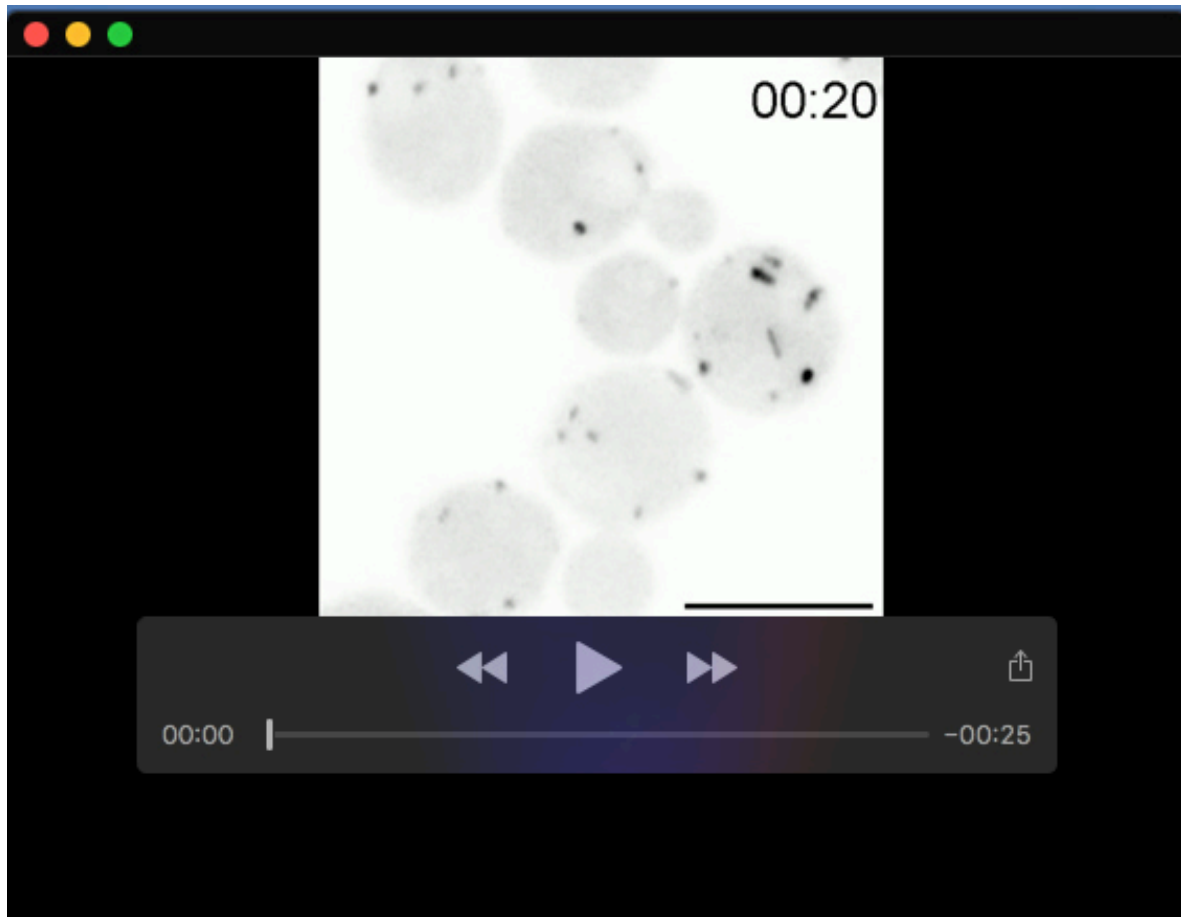

**Movie 1. Disintegration of eisosome remnants and formation of Lsp1 eisosomes following myriocin-induced inhibition of SPT**

*LSP1-GFP* expressing yeast cells were grown exponentially for 4 hours at 28°C and treated with 10 μM myriocin at time t = 0 min. Z-stacks were recorded for 2 hours in 5 min increments. The obtained images were drift corrected and maximum intensity projections calculated in proprietary Zeiss ZEN software. Timestamp shows time following myriocin addition in HH:MM format. Scale bar: 5 μm.
